# Supplementary material
Source: PubMed Central journal article supplement (PMC2666550)
Supplement: C800214200_1.pdf [file C800214200_1.pdf]

# Supplementary Material

## SOLUTION STRUCTURE OF THE FACTOR H BINDING PROTEIN, A PROTECTIVE ANTIGEN OF *NEISSERIA MENINGITIDIS*

\*Address correspondence to: Rino Rappuoli Novartis Vaccines and Diagnostics. Via Fiorentina, 1, 53100 Siena, Italy. Phone +39 0577 243414. Fax +39-0577-243564 Email: [rino.rappuoli@novartis.com](mailto:rino.rappuoli@novartis.com); Lucia Banci, Magnetic Resonance Center (CERM) – University of Florence, Via L. Sacconi 6, 50019 Sesto Fiorentino, Italy Phone +39 055 457 4263 Fax +39 055 457 4253 Email: [banci@cerm.unifi.it](mailto:banci@cerm.unifi.it)

**Fig. S1.** 2D  $^{15}\text{N}$ - $^1\text{H}$  HSQC spectrum (900MHz, 298K) of fHbp. The protein concentration was 0.5 mM, in 50 mM phosphate buffer pH 7.

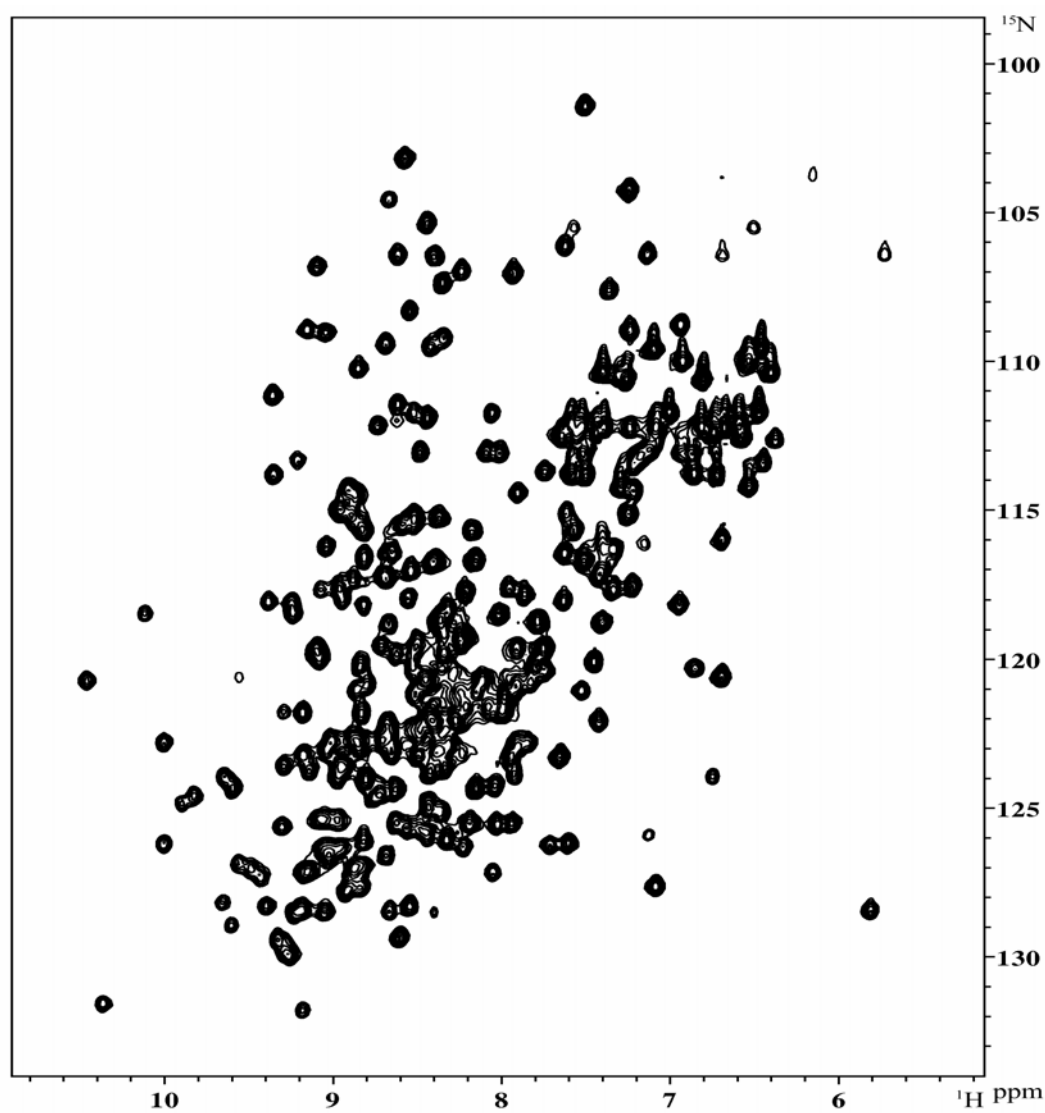

**Fig. S2.** Solution structures of the fHbp (residues 11-255). The radius of the tube is proportional to the backbone RMSD of each residue. The secondary structure elements are shown:  $\beta$ -strands of the N-terminal domain are shown in cyan and helices in red, while  $\beta$ -strands of the C-terminal domain are in blue. When the residues of the secondary structure elements are superimposed, the backbone RMSD is 1.1 Å.

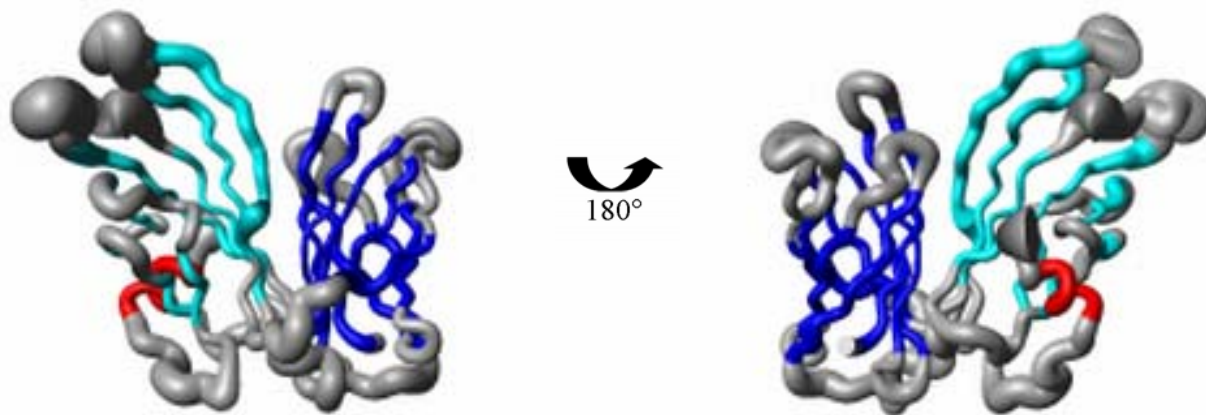

**Fig. S3.** Experimental  $^{15}\text{N}$   $R_1$ ,  $R_2$  rates and heteronuclear NOEs of fHbp and spectral density functions  $J(\omega_H)$ ,  $J(\omega_N)$ ,  $J(0)$  as obtained from the  $^{15}\text{N}$  relaxation data. The experimental data are measured at 500 MHz and 298 K, on a 0.5 mM sample in 50 mM phosphate buffer pH 7.

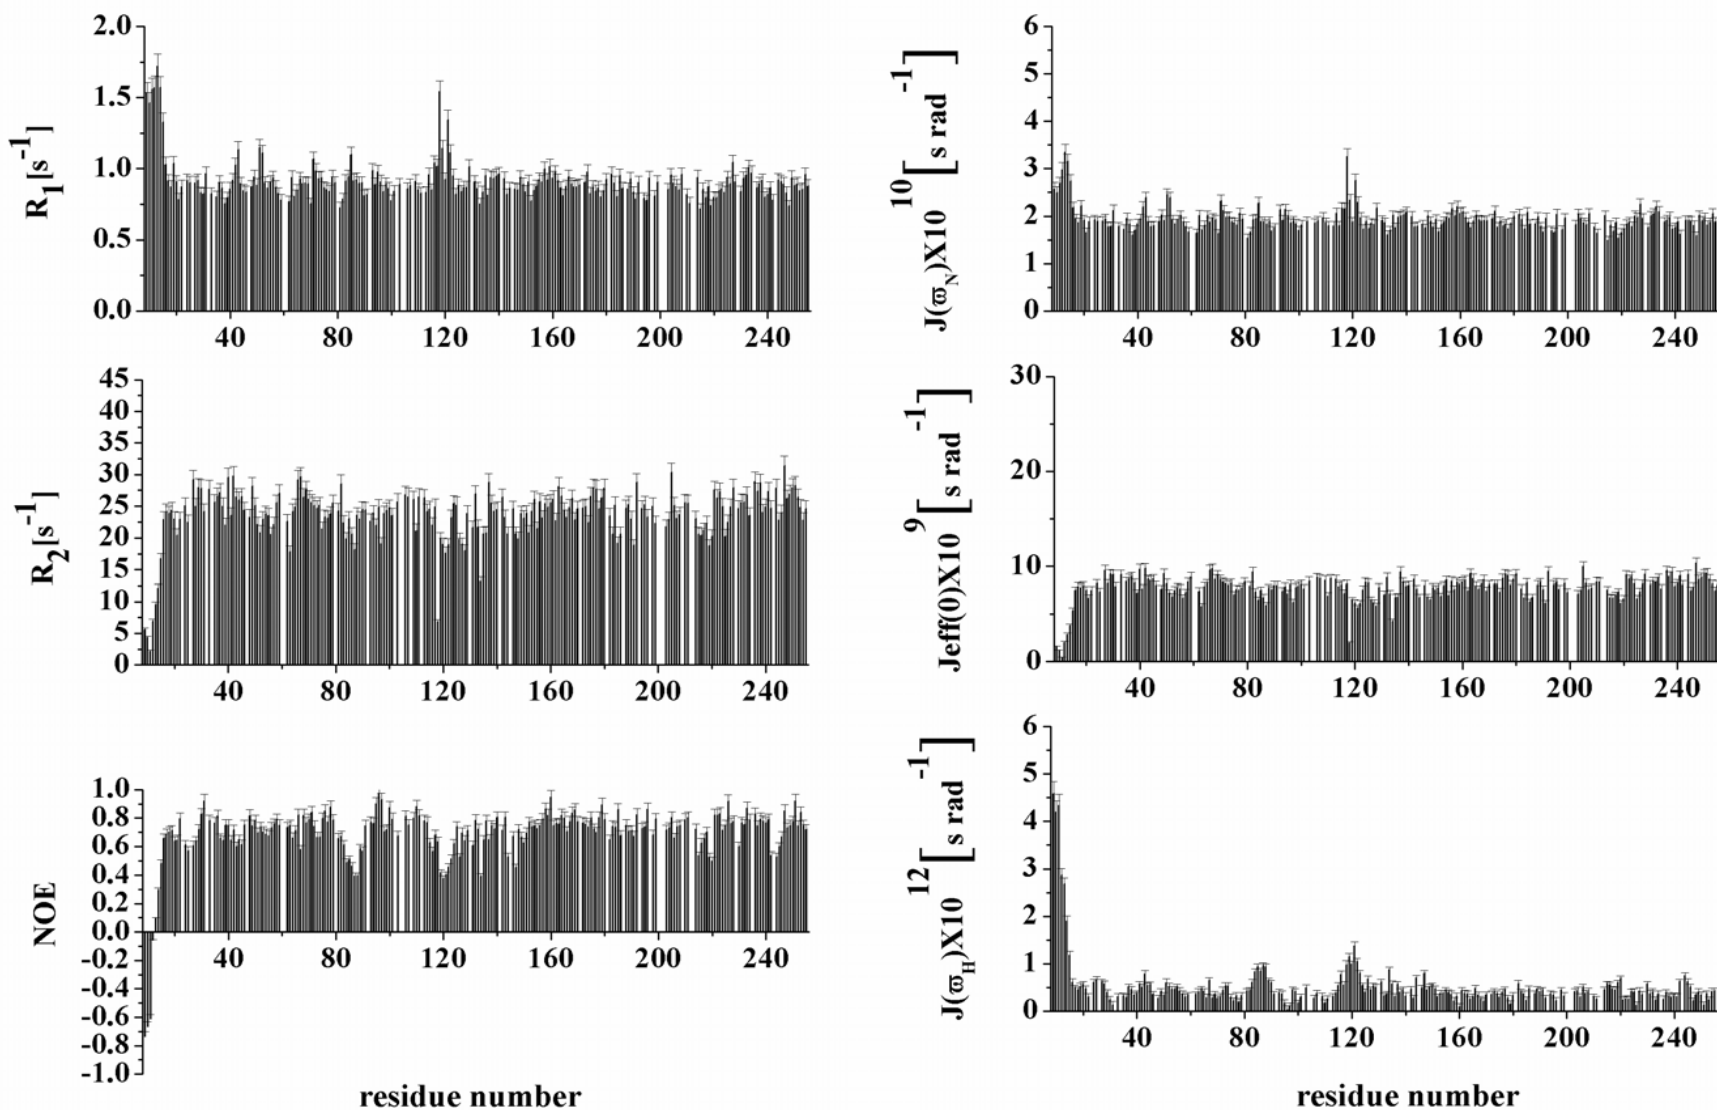

**Fig. S4.** Number of meaningful NOEs per residue of the fHbp protein. White, light gray, dark gray and black bars indicate intra-residue, sequential, medium-range, and long-range connectivities, respectively.

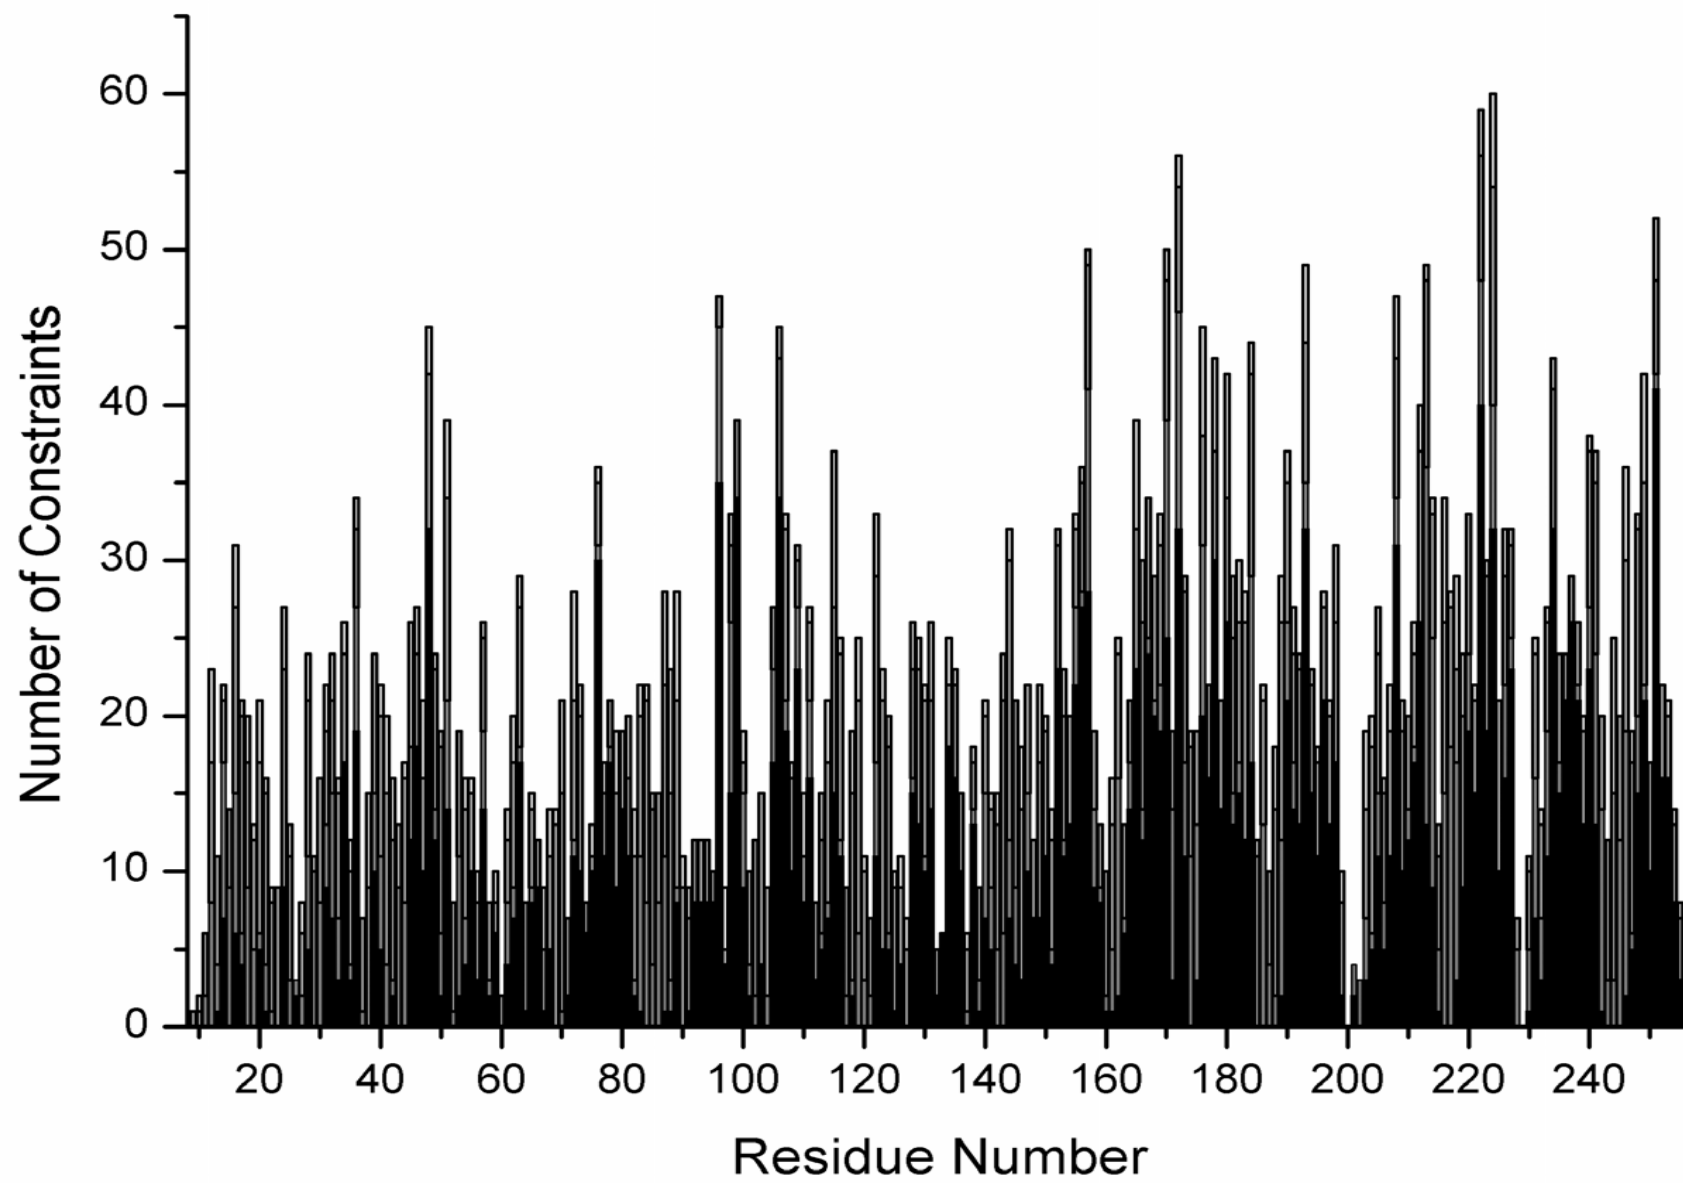

**Fig. S5.** RMSD values per residue to the mean structure for the backbone (filled squares) and all heavy atoms (open circles) of the family of 30 conformers of fHbp after energy minimization (residues 14-255). The secondary structure elements are also reported at the top.

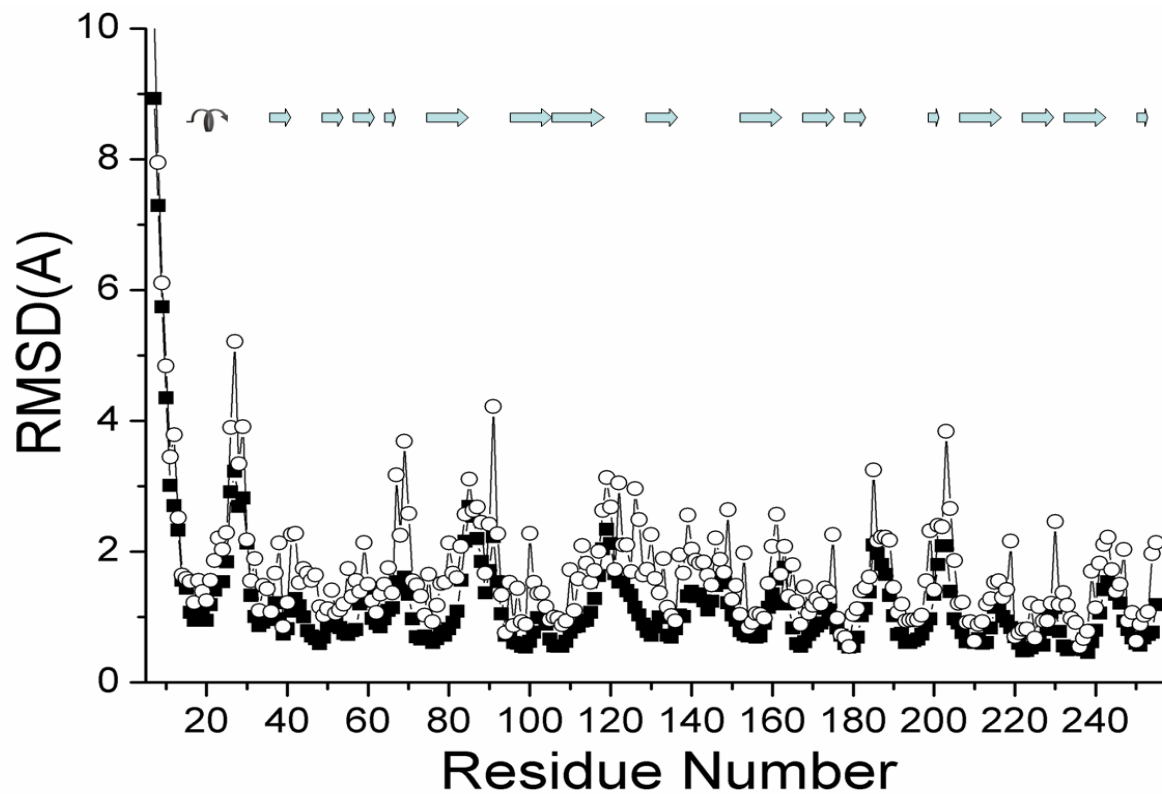

**Fig.S6** Combined chemical shift differences ( $\Delta\delta^{\text{comb}}$ ) between the isolated fHbp C-terminal domain(9;10), and the same stretch in the full length protein. The  $\Delta\delta^{\text{comb}}$  are calculated from the experimental  $^1\text{H}$  and  $^{15}\text{N}$  chemical shift variations ( $\Delta\delta(^1\text{H})$  and  $\Delta\delta(^{15}\text{N})$ , respectively) measured between corresponding peaks in the two constructs, through the following equation

$$\Delta\delta^{\text{combined}} = \sqrt{\frac{(\Delta\delta(^1\text{H}))^2 + \frac{1}{25}(\Delta\delta(^{15}\text{N}))^2}{2}}$$

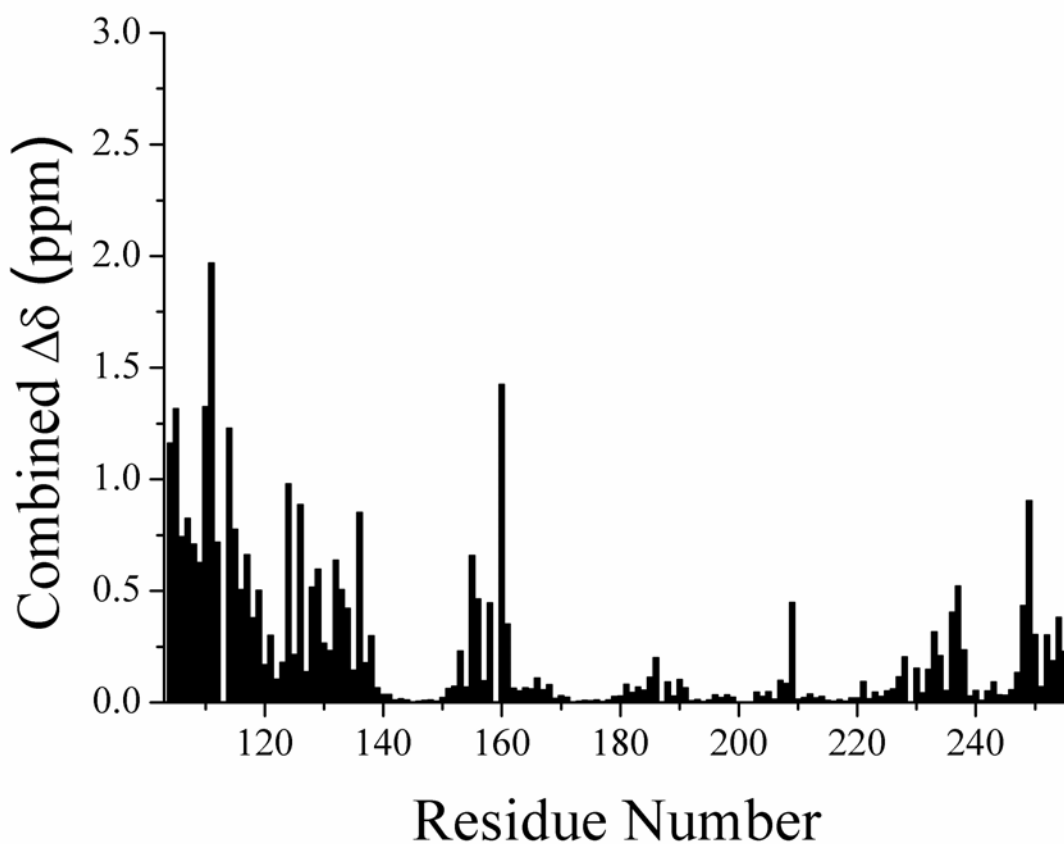

**Fig. S7.** Observed versus calculated residual dipolar couplings in the final structure refinement with the RDC constraints. The line represents the expected correlation ( $y = x$ ).

The RDC values of the following residues were used for structure calculations: 10-12,21-22,26,39,43-46,48,51,56,59,65,66,68,72,75,87,88,90,94,100,101,104,109,110,118-120,122-123,126,127,129,130,135,136,142,146,147,150,158,165,171-174,177,185,189,201,202,204,207,208,211,212,214-218,228,230-233,243,244,246



**Table S1.** Acquisition parameters for NMR experiments performed on fHbp.

| Experiments <sup>b</sup>                                                    | Dimension of acquired data<br>(nucleus) |                        |                       | Spectral width<br>(ppm) |                |                | n <sup>a</sup> | Refs      |
|-----------------------------------------------------------------------------|-----------------------------------------|------------------------|-----------------------|-------------------------|----------------|----------------|----------------|-----------|
|                                                                             | t <sub>1</sub>                          | t <sub>2</sub>         | t <sub>3</sub>        | F <sub>1</sub>          | F <sub>2</sub> | F <sub>3</sub> |                |           |
| [ <sup>1</sup> H- <sup>1</sup> H]-NOESY <sup>c</sup>                        | 976( <sup>1</sup> H)                    | 2048( <sup>1</sup> H)  |                       | 15                      | 15             |                | 120            | (11)      |
| <sup>1</sup> H- <sup>15</sup> N-HSQC                                        | 192( <sup>15</sup> N)                   | 1024( <sup>1</sup> H)  |                       | 40                      | 14             |                | 4              | (12)      |
| <sup>1</sup> H- <sup>13</sup> C-HSQC                                        | 256( <sup>13</sup> C)                   | 2048( <sup>1</sup> H)  |                       | 80                      | 14             |                | 8              | (13)      |
| trhncocacb <sup>d</sup>                                                     | 112( <sup>13</sup> C)                   | 54( <sup>15</sup> N)   | 1024( <sup>1</sup> H) | 75                      | 41             | 14             | 40             | (14)      |
| trhncacb <sup>d</sup>                                                       | 112( <sup>13</sup> C)                   | 54( <sup>15</sup> N)   | 1024( <sup>1</sup> H) | 75                      | 41             | 14             | 32             | (14)      |
| trhnco <sup>d</sup>                                                         | 80( <sup>13</sup> C)                    | 56( <sup>15</sup> N)   | 1024( <sup>1</sup> H) | 18                      | 40             | 16             | 8              | (15)      |
| trhncaco <sup>d</sup>                                                       | 80( <sup>13</sup> C)                    | 56( <sup>15</sup> N)   | 1024( <sup>1</sup> H) | 18                      | 39             | 16             | 16             | (16)      |
| trhnca <sup>d</sup>                                                         | 88( <sup>13</sup> C)                    | 52( <sup>15</sup> N)   | 1024( <sup>1</sup> H) | 14                      | 41             | 75             | 16             | (14)      |
| trhncoca <sup>d</sup>                                                       | 88( <sup>13</sup> C)                    | 52( <sup>15</sup> N)   | 1024( <sup>1</sup> H) | 14                      | 41             | 75             | 32             | (14)      |
| hbhaconh                                                                    | 128( <sup>1</sup> H)                    | 48( <sup>15</sup> N)   | 1024( <sup>1</sup> H) | 14                      | 40             | 14             | 24             | (17)      |
| (Hb)Cb(CgCd)H                                                               | 80( <sup>1</sup> H)                     | 2048( <sup>13</sup> C) |                       | 14                      | 40             |                | 224            | (18)      |
| (H)CCH-TOCSY <sup>e</sup>                                                   | 240( <sup>13</sup> C)                   | 80( <sup>13</sup> C)   | 1024( <sup>1</sup> H) | 14                      | 80             | 80             | 8              | (19)      |
| <sup>15</sup> N-edited [ <sup>1</sup> H- <sup>1</sup> H]-NOESY              | 240( <sup>1</sup> H)                    | 56( <sup>15</sup> N)   | 2048( <sup>1</sup> H) | 15                      | 41             | 15             | 8              | (20);(13) |
| <sup>13</sup> C-edited [ <sup>1</sup> H- <sup>1</sup> H]-NOESY <sup>e</sup> | 192( <sup>1</sup> H)                    | 64( <sup>13</sup> C)   | 2048( <sup>1</sup> H) | 14                      | 80             | 14             | 16             | (25)      |
| <sup>13</sup> C-edited [1H-1H]-NOESY <sup>f</sup>                           | 128( <sup>1</sup> H)                    | 56( <sup>13</sup> C)   | 2048( <sup>1</sup> H) | 14                      | 24             | 14             | 8              | (25)      |
| <sup>15</sup> N R <sub>1</sub> <sup>g</sup>                                 | 256( <sup>15</sup> N)                   | 1024( <sup>1</sup> H)  |                       | 40                      | 14             |                | 8              | (7;21)    |
| <sup>15</sup> N R <sub>2</sub> <sup>g</sup>                                 | 256( <sup>15</sup> N)                   | 1024( <sup>1</sup> H)  |                       | 40                      | 14             |                | 16             | (7;21)    |
| <sup>1</sup> H- <sup>15</sup> N NOE <sup>g</sup>                            | 480( <sup>15</sup> N)                   | 1024( <sup>1</sup> H)  |                       | 40                      | 14             |                | 32             | (7;21)    |

<sup>a</sup> number of acquired scans. <sup>b</sup> All the experiments were acquired on a 500, 700 and 900 MHz spectrometer equipped with a triple resonance cryoprobe at 298 K. All the triple resonance (TXI 5-mm) probes used were equipped with Pulsed Field Gradients along the z-axis. <sup>c</sup> The experiment was acquired in D<sub>2</sub>O for the assignment of the aromatic protons. <sup>d</sup> The experiments were acquired on <sup>15</sup>N <sup>13</sup>C <sup>2</sup>H sample. <sup>e</sup> The F2 carrier was at 39 ppm. <sup>f</sup> The F2 carrier was at 43 ppm. <sup>g</sup> The <sup>15</sup>N longitudinal relaxation rates, R<sub>1</sub>, were measured using delays in the pulse sequence of 2.5, 35, 75, 125, 200, 370, 500, 675, 1000, 2000, and 3000 ms for all samples. The <sup>15</sup>N transverse relaxation rates, R<sub>2</sub>, were measured using the CPMG sequence. The relaxation delays used were 16.96, 33.92, 50.88, 84.81, 118.72, 152.64, 169.60, 220.48, 254.40, 305.28 ms. The interscan delay (d1) was 3 s for R<sub>1</sub> and R<sub>2</sub> and 6 s for <sup>1</sup>H-<sup>15</sup>N NOE respectively. All 3D and 2D spectra were processed using the standard Bruker software TOPSPIN and analyzed through CARRA and XEASY programs (22-24)

**Table S2**  $^1\text{H}$ ,  $^{15}\text{N}$  and  $^{13}\text{C}$  resonance assignments for fHpb at 298 K, pH 7.0, in water solution. In total, the resonances of 80% of carbon atoms, 97% of nitrogen atoms and 99% of protons were assigned. Proton resonances were calibrated with respect to the signal of 2,2-dimethylsilapentane-5-sulfonic acid (DSS). Nitrogen chemical shifts were referenced indirectly to the  $^1\text{H}$  standard using a conversion factor derived from the ratio of NMR frequencies. Carbon resonances were calibrated using the signal of dioxane at 69.4 ppm (298 K) as secondary reference.

| aa     | N (HN)        | CO    | C $\alpha$ (H $\alpha$ ) | C $\beta$ (H $\beta$ ) | Others                                                                            |
|--------|---------------|-------|--------------------------|------------------------|-----------------------------------------------------------------------------------|
| ALA -9 | 128.5 (8.40)  | 177.3 | 52.2 (4.22)              | 19.3 (1.30)            |                                                                                   |
| ALA-10 | 123.7 (8.34)  | 177.2 | 51.8 (4.15)              | 19.3 (1.26)            |                                                                                   |
| ASP-11 | 119.2 (8.23)  | 176.4 | 53.7 (4.49)              | 40.6 (2.60 , 2.49)     |                                                                                   |
| ILE-12 | 121.3 (7.99)  | 176.9 | 61.8 (4.01)              | 38.1 (1.84)            | C $\delta$ 1 12.9 (0.76) C $\gamma$ 1 26.8 (1.10 , 1.35) C $\gamma$ 2 17.4 (0.80) |
| GLY-13 | 111.8 (8.44)  | 173.7 | 44.9 (3.81)              |                        |                                                                                   |
| ALA-14 | 123.2 (7.95)  | 178.0 | 52.4 (4.21)              | 19.3 (1.30)            |                                                                                   |
| GLY-15 | 107.4 (8.35)  | 174.3 | 45.6 (4.02 , 3.77)       |                        |                                                                                   |
| LEU-16 | 117.6 (7.22)  | 178.2 | 57.9 (3.74)              | 40.7 (1.37 , 0.99)     | C $\delta$ 1 24.9 (0.66) C $\delta$ 2 21.7 (0.18) C $\gamma$ 24.4 (1.28)          |
| ALA-17 | 117.8 (7.86)  | 181.1 | 54.9 (3.94)              | 17.2 (1.38)            |                                                                                   |
| ASP-18 | 118.4 (8.02)  | 177.9 | 56.3 (4.22)              | 39.3 (2.25 , 2.56)     |                                                                                   |
| ALA-19 | 121.5 (8.21)  | 178.9 | 55.0 (3.95)              | 17.8 (1.42)            |                                                                                   |
| LEU-20 | 113.4 (7.22)  | 177.5 | 55.5 (4.26)              | 42.2 (1.95 , 1.29)     | C $\delta$ 1 23.3 (0.65) C $\gamma$ 26.0 (0.84)                                   |
| THR-21 | 106.1 (7.62)  | 175.0 | 61.7 (4.39)              | 71.5 (4.14)            | C $\gamma$ 2 20.9 (1.15)                                                          |
| ALA-22 | 127.8 (8.93)  | 176.0 | 50.7 (4.62 , 6.50)       | 18.7 (1.34)            |                                                                                   |
| PRO-23 |               |       | 61.5 (4.43)              | 31.8 (2.19 , 1.85)     | C $\delta$ 50.1 (3.75 , 3.55) C $\gamma$ 26.5 (1.92 , 1.83)                       |
| LEU-24 | 121.0 (8.15)  | 176.4 | 55.5 (3.89)              | 40.9 (1.47 , 1.22)     | C $\delta$ 1 16.2 (0.63) C $\delta$ 2 25.1 (0.72) C $\gamma$ 26.7 (1.37)          |
| ASP-25 | 124.7 (8.76)  | 176.4 | 52.7 (4.63)              | 42.8 (2.24 , 2.77)     |                                                                                   |
| HIS-26 |               |       | 58.1 (4.27)              | 29.2 (3.08)            | H $\delta$ 2 6.92 H $\epsilon$ 1 7.71                                             |
| LYS-27 | 118.4 (8.35)  | 177.4 | 56.3 (3.97)              | 30.9 (1.58)            | C $\epsilon$ 40.9 (2.85) C $\gamma$ 23.7 (1.07 , 0.97) C $\delta$ 27.9 (1.51)     |
| ASP-28 | 120.0 (7.45)  | 176.2 | 54.2 (4.31)              | 40.1 (2.56 , 2.44)     |                                                                                   |
| LYS-29 | 121.9 (8.42)  | 177.4 | 56.3 (3.96)              | 31.9 (1.64)            | C $\delta$ 33.1 (1.56) C $\gamma$ 24.8 (1.42 , 1.28) C $\epsilon$ 42.1 (2.54)     |
| GLY-30 | 111.5 (8.61)  | 174.2 | 44.8 (3.56 , 3.52)       |                        |                                                                                   |
| LEU-31 | 127.2 (8.05)  | 177.9 | 55.9 (3.77)              | 44.4 (1.23 , 0.76)     | C $\delta$ 1 26.9 (0.39) C $\delta$ 2 22.7 (0.71) C $\gamma$ 27.3 (1.54)          |
| GLN-32 | 131.8 (9.18)  | 174.3 | 57.9 (3.44)              | 27.7 (2.02 , 1.95)     | C $\gamma$ 34.6 (2.19 , 2.05) N $\epsilon$ 2 112.5 (7.57 , 6.57)                  |
| SER-33 | 108.9 (7.24)  | 171.1 | 56.8 (4.98)              | 64.6 (3.64 , 3.44)     |                                                                                   |
| LEU-34 | 121.8 (8.01)  | 174.7 | 53.3 (4.37)              | 45.6 (1.15)            | C $\delta$ 1 26.2 (0.37) C $\gamma$ 26.4 (1.24) C $\delta$ 2 26.2 (0.46)          |
| THR-35 | 123.9 (8.81)  | 172.8 | 62.6 (4.05)              | 68.2 (3.85)            | C $\gamma$ 2 22.0 (0.93)                                                          |
| LEU-36 | 128.4 (8.66)  | 174.7 | 53.8 (4.15)              | 40.6 (1.87 , 0.81)     | C $\delta$ 1 22.1 (0.47) C $\delta$ 2 25.5 (0.10) C $\gamma$ 25.0 (1.47)          |
| ASP-37 | 123.2 (8.50)  |       | 54.7 (4.84)              | 43.1 (2.70 , 2.44)     |                                                                                   |
| GLN-38 | 120.7 (10.45) | 178.5 | 56.3 (3.81)              | 28.2 (1.89 , 1.42)     | C $\gamma$ 33.7 (2.37 , 2.27) N $\epsilon$ 2 113.8 (7.50 , 6.72)                  |
| SER-39 | 111.7 (8.52)  | 171.8 | 61.4 (4.08)              | 63.0 (3.79 , 3.56)     |                                                                                   |
| VAL-40 | 116.0 (6.69)  | 172.3 | 60.4 (3.89)              | 32.3 (1.77)            | C $\gamma$ 1 21.3 (0.77) C $\gamma$ 2 18.9 (0.59)                                 |
| ARG-41 | 125.4 (8.18)  | 176.9 | 55.6 (4.18)              | 30.6 (2.15 , 1.67)     | C $\delta$ 42.4 (2.98) C $\gamma$ 27.1 (1.30 , 1.50)                              |
| LYS-42 | 119.4 (8.49)  | 176.6 | 58.7 (3.78)              | 32.0 (1.64 , 1.48)     | C $\epsilon$ 41.8 (2.84) C $\gamma$ 24.7 (1.43) C $\delta$ 28.6 (1.52)            |
| ASN-43 | 115.5 (8.51)  | 173.9 | 55.1 (4.44)              | 37.1 (3.12 , 2.82)     | N $\delta$ 2 113.1 (7.52 , 6.88)                                                  |

|        |              |       |                    |                    |                                                            |
|--------|--------------|-------|--------------------|--------------------|------------------------------------------------------------|
| GLU-44 | 118.7 (7.79) | 175.3 | 54.8 (4.77)        | 32.3 (2.19 , 1.78) |                                                            |
| LYS-45 | 117.1 (8.71) | 174.3 | 52.8 (4.61)        | 35.2 (1.43)        | Cδ 28.3 (1.52) Cε 42.3 (2.82) Cγ 24.0 (1.24 , 1.20)        |
| LEU-46 | 125.3 (9.09) | 173.8 | 52.6 (5.04)        | 44.9 (1.74 , 1.03) | Cδ1 24.7 (0.09) Cγ 25.3 (1.19)                             |
| LYS-47 | 129.8 (9.26) | 175.6 | 53.9 (5.05)        | 33.0 (1.72 , 1.52) | Cδ 30.4 (1.59) Cε 41.1 (2.63) Cγ 28.1 (1.53)               |
| LEU-48 | 126.3 (8.95) | 175.6 | 52.0 (5.46)        | 44.4 (0.89 , 0.84) | Cδ1 24.2 (-0.32) Cδ2 23.1 (0.10) Cγ 26.6 (0.67)            |
| ALA-49 | 120.8 (8.80) | 176.3 | 51.0 (5.30)        | 23.5 (1.36)        |                                                            |
| ALA-50 | 120.7 (8.12) | 176.3 | 53.0 (4.49)        | 23.7 (1.39)        |                                                            |
| GLN-51 | 116.3 (9.04) | 175.3 | 56.1 (3.77)        | 27.3 (2.25 , 1.89) | Cγ 34.0 (2.35 , 2.31) Nε2 112.0 (7.53 , 6.82)              |
| GLY-52 | 105.4 (8.44) | 173.1 | 45.0 (4.07 , 3.51) |                    |                                                            |
| ALA-53 | 124.4 (8.15) | 176.0 | 49.9 (4.77)        | 22.7 (1.41)        |                                                            |
| GLU-54 | 116.7 (8.16) | 174.2 | 54.3 (5.49)        | 34.3 (1.91 , 1.75) | Cγ 32.9 (2.03)                                             |
| LYS-55 | 122.9 (8.85) | 172.9 | 56.4 (4.19)        | 34.7 (1.92 , 1.73) | Cδ 29.2 (1.42) Cγ 23.9 (1.18)                              |
| THR-56 | 120.8 (7.91) | 173.1 | 62.0 (4.91)        | 68.6 (3.69)        | Cγ2 21.9 (0.94)                                            |
| TYR-57 | 127.4 (9.43) | 174.2 | 57.4 (4.49)        | 41.9 (2.75 , 2.54) | Qδ 6.79 Qε 6.44                                            |
| GLY-58 | 108.9 (9.15) | 172.5 | 42.3 (3.54)        |                    |                                                            |
| ASN-59 | 117.3 (8.88) | 176.3 | 57.1 (4.03)        | 39.7 (2.64 , 2.19) |                                                            |
| GLY-60 | 114.9 (8.95) | 174.1 | 44.9 (4.22 , 3.35) |                    |                                                            |
| ASP-61 | 122.0 (7.99) | 174.7 | 54.4 (4.49)        | 41.8 (3.15 , 2.87) |                                                            |
| SER-62 | 113.1 (8.48) | 173.1 | 57.2 (4.96)        | 64.5 (3.61 , 3.50) |                                                            |
| LEU-63 | 126.4 (9.00) | 175.9 | 53.1 (4.50)        | 43.8 (1.58 , 1.04) | Cδ1 22.2 (0.29) Cγ 25.9 (0.40)                             |
| ASN-64 | 125.6 (8.48) | 173.9 | 50.6 (4.75)        | 35.2 (3.72 , 2.60) |                                                            |
| THR-65 | 113.8 (7.75) | 177.2 | 63.2 (4.77)        | 63.5 (3.85)        | Cγ2 23.5 (0.75)                                            |
| GLY-66 | 114.4 (8.87) | 173.3 | 44.9 (3.84 , 3.72) |                    |                                                            |
| LYS-67 | 112.6 (6.38) | 176.3 | 54.3 (4.02)        | 32.2 (1.45)        | Cε 42.0 (2.62) Cγ 27.8 (1.35)                              |
| LEU-68 | 116.7 (7.33) | 176.3 | 52.5 (4.28)        | 40.6 (1.38)        | Cδ1 22.4 (0.72) Cγ 30.2 (1.29)                             |
| LYS-69 | 119.8 (8.51) | 175.9 | 55.0 (3.99)        | 32.4 (1.47)        | Cδ 28.2 (1.48) Cε 41.9 (2.87 , 2.81) Cγ 24.5 (1.29 , 1.19) |
| ASN-70 | 121.5 (8.08) | 174.4 | 54.4 (3.84)        | 38.1 (2.41 , 2.16) | Nδ2 112.3 (7.46 , 6.74)                                    |
| ASP-71 | 113.4 (9.22) | 173.0 | 54.7 (3.69)        | 38.5 (2.75 , 2.86) |                                                            |
| LYS-72 | 113.4 (6.44) | 174.7 | 53.1 (4.41)        | 36.1 (1.50 , 1.23) | Cε 39.3 (2.79) Cγ 23.4 (1.11 , 1.04)                       |
| VAL-73 | 122.1 (8.68) | 176.6 | 62.1 (4.19)        | 32.0 (1.71)        | Cγ1 21.2 (0.39)                                            |
| SER-74 | 127.0 (9.50) | 172.2 | 58.3 (4.51)        | 64.0 (3.31)        |                                                            |
| ARG-75 | 122.6 (7.85) | 173.3 | 55.3 (5.03)        | 31.9 (1.64)        | Cδ 41.8 (2.82) Cγ 28.8 (1.32)                              |
| PHE-76 | 118.1 (9.25) | 175.8 | 55.2 (4.81)        | 43.6 (2.94)        | Qδ 7.09 Qε 6.98                                            |
| ASP-77 | 123.6 (9.14) | 176.5 | 55.1 (5.36)        | 41.3 (2.81 , 2.69) |                                                            |
| PHE-78 | 119.7 (9.09) | 174.0 | 54.9 (6.43)        | 42.5 (2.62 , 2.96) | Qδ 6.11 Qε 6.44 HZ 6.42                                    |
| ILE-79 | 119.8 (8.62) | 174.0 | 61.2 (4.33)        | 41.9 (1.59)        | Cδ1 13.2 (0.70) Cγ1 27.5 (1.48 , 0.92) Cγ2 18.0 (0.84)     |
| ARG-80 | 128.4 (9.05) | 174.9 | 54.4 (5.31)        | 33.7 (1.70)        | Cγ 33.0 (1.54) Cδ 41.8 (1.13)                              |
| GLN-81 | 125.5 (9.30) | 173.7 | 53.7 (5.56)        | 34.0 (1.75)        | Cγ 34.1 (1.96) Nε2 109.9 (6.93 , 6.55)                     |
| ILE-82 | 115.5 (8.59) | 172.5 | 59.6 (4.58)        | 42.2 (1.65)        | Cδ1 13.5 (0.74) Cγ1 26.7 (1.35 , 0.93) Cγ2 16.8 (0.82)     |
| GLU-83 | 124.9 (8.43) | 175.6 | 54.8 (4.94)        | 30.5 (1.79 , 1.58) | Cγ 35.8 (1.58 , 1.72)                                      |
| VAL-84 | 127.0 (8.88) | 175.7 | 61.4 (4.08)        | 34.0 (1.76)        | Cγ1 20.5 (0.74)                                            |
| ASP-85 | 129.4 (9.33) | 175.8 | 55.1 (4.16)        | 38.9 (2.83 , 2.46) |                                                            |
| GLY-86 | 103.3 (8.57) | 173.4 | 44.8 (3.99 , 3.51) |                    |                                                            |
| GLN-87 | 119.7 (7.75) | 173.9 | 53.3 (4.48)        | 30.7 (1.95 , 1.83) | Cγ 32.9 (2.20 , 2.15)                                      |

|         |               |       |                    |                    |                                                        |
|---------|---------------|-------|--------------------|--------------------|--------------------------------------------------------|
| LEU-88  | 123.5 (8.42)  | 176.3 | 53.8 (4.63)        | 41.7 (1.47 , 1.12) | Cδ1 24.1 (0.65) Cδ2 23.0 (0.53) Cγ 26.7 (1.35)         |
| ILE-89  | 127.2 (9.15)  | 175.7 | 59.4 (4.25)        | 39.6 (1.76)        | Cδ1 11.7 (0.63) Cγ1 26.9 (1.26 , 1.12) Cγ2 16.8 (0.68) |
| THR-90  | 123.1 (8.66)  | 172.9 | 62.6 (4.20)        | 68.6 (4.03)        | Cγ2 21.6 (1.03)                                        |
| LEU-91  | 125.3 (8.97)  | 177.4 | 55.5 (4.26)        | 44.3 (1.42 , 1.30) | Cδ1 25.4 (0.67)                                        |
| GLU-92  | 116.7 (7.50)  | 172.7 | 54.7 (5.03)        | 33.7 (2.12 , 1.96) | Cγ 36.2 (2.41, 2.50)                                   |
| SER-93  | 117.9 (8.95)  | 172.8 | 57.3 (4.25)        | 65.5 (3.89 , 3.44) |                                                        |
| GLY-94  | 108.6 (6.93)  | 171.1 | 46.6 (3.69)        |                    |                                                        |
| GLU-95  | 128.2 (9.67)  | 173.2 | 54.8 (5.64)        | 34.3 (2.36 , 2.30) | Cγ 39.2 (2.15)                                         |
| PHE-96  | 131.6 (10.37) | 173.0 | 54.6 (5.05)        | 42.1 (2.82 , 2.6)  | Qδ 7.04 Qε 6.11                                        |
| GLN-97  | 126.5 (8.69)  | 174.2 | 53.2 (4.96)        | 28.8 (1.97)        | Cγ 32.9 (1.52) Nε2 109.5 (6.44 , 7.10)                 |
| VAL-98  | 118.8 (8.68)  | 173.8 | 59.7 (4.57)        | 35.1 (1.57)        | Cγ1 21.5 (0.41) Cγ2 20.0 (0.47)                        |
| TYR-99  | 127.6 (8.90)  | 173.3 | 56.9 (4.94)        | 40.8 (2.77)        | Qδ 6.31 Qε 6.11                                        |
| LYS-100 | 128.3 (5.81)  |       | 55.7 (4.25)        | 35.9 (1.48)        | Cδ 28.4 Cγ 27.9                                        |
| GLN-101 | 125.8 (8.44)  | 174.1 | 55.1 (5.03)        | 27.6 (2.27)        | Cγ 36.22 (2.13)                                        |
| SER-102 | 117.7 (9.06)  |       | 63.0 (3.05)        | 63.2 (3.68)        |                                                        |
| HIS-103 | 118.4 (10.12) |       | 53.8 (4.41)        | 30.3 (2.23)        | Hδ2 6.52 Hε1 7.73                                      |
| SER-104 | 112.3 (7.24)  |       | 56.7 (4.41)        | 65.5 (2.82)        |                                                        |
| ALA-105 | 116.8 (8.42)  | 173.2 | 51.4 (4.75)        | 22.3 (1.08)        |                                                        |
| LEU-106 | 115.2 (8.38)  | 175.3 | 53.8 (5.55)        | 46.4 (1.71)        | Cδ1 26.8 (1.00) Cδ2 27.4 (0.93) Cγ 28.0 (1.73)         |
| THR-107 | 109.4 (8.69)  | 172.5 | 57.1 (5.29)        | 71.3 (3.39)        | Cγ2 22.8 (0.72)                                        |
| ALA-108 | 120.7 (8.46)  | 173.4 | 51.0 (4.37)        | 23.4 (0.95)        |                                                        |
| PHE-109 | 115.0 (8.51)  | 174.2 | 56.6 (4.71)        | 41.9 (2.45)        | Qδ 6.05 Qε 6.53 HZ 7.44                                |
| GLN-110 | 124.5 (9.83)  | 175.2 | 53.2 (5.23)        | 29.2 (2.27)        | Cγ 35.5 (2.50) Nε2 116.0 (7.42 , 7.16)                 |
| THR-111 | 126.8 (9.57)  | 174.5 | 66.4 (4.19)        | 69.4 (4.04)        | Cγ 2 22.7 (1.50)                                       |
| GLU-112 | 121.7 (9.30)  | 177.4 | 56.2 (4.81)        | 31.3 (2.12)        | Cγ 42.6 (2.44)                                         |
| GLN-113 | 117.6 (7.95)  | 174.0 | 53.8 (5.23)        | 32.5 (2.03 , 1.97) | Cγ 33.4 (2.19)                                         |
| ILE-114 | 115.0 (8.97)  | 174.1 | 59.0 (4.91)        | 42.8 (1.84)        | Cδ1 13.3 (0.76) Cγ1 26.6 (1.41) Cγ2 19.1 (0.89)        |
| GLN-115 | 122.0 (7.42)  | 175.7 | 56.1 (4.41)        | 28.5 (2.14 , 1.97) | Cγ 33.1 (2.39 , 2.23) Nε2 110.4 (7.40 , 6.41)          |
| ASP-116 | 125.6 (8.57)  | 176.7 | 53.5 (4.38)        | 41.2 (2.31 , 3.02) |                                                        |
| SER-117 | 120.7 (8.45)  | 174.8 | 60.8 (4.02)        | 62.6 (3.84)        |                                                        |
| GLU-118 | 119.4 (8.25)  | 175.9 | 56.0 (4.04)        | 29.9 (1.65)        | Cγ 35.6 (2.04 , 1.88)                                  |
| HIS-119 | 117.3 (7.42)  | 173.5 | 54.5 (4.61)        | 28.7 (2.98 , 2.91) | Hδ2 7.15 Hε1 7.70                                      |
| SER-120 | 116.8 (8.40)  | 175.7 | 59.1 (4.18)        | 62.8 (3.78)        |                                                        |
| GLY-121 | 112.2 (8.73)  | 173.5 | 44.7 (4.05 , 3.72) |                    |                                                        |
| LYS-122 | 120.2 (7.80)  | 175.1 | 55.1 (4.46)        | 33.9 (1.81 , 1.76) | Cδ 27.7 (1.48 , 1.31) Cγ 24.6 (1.25 , 1.20)            |
| MET-123 | 119.8 (8.35)  | 176.2 | 52.9 (5.08)        | 33.8 (1.76 , 1.82) | Cγ 30.6 (2.45 , 2.24) Cε1 16.2 (1.47)                  |
| VAL-124 | 118.5 (9.24)  | 174.0 | 59.1 (4.47)        | 34.4 (1.97)        | Cγ1 19.5 (0.77)                                        |
| ALA-125 | 125.9 (8.33)  | 177.2 | 52.0 (4.62)        | 18.2 (1.27)        |                                                        |
| LYS-126 | 126.1 (7.60)  | 172.6 | 56.0 (4.05)        | 34.5 (1.48)        | Cδ 30.6 (1.99) Cγ 28.9 (1.55) Cε 41.7 (2.84)           |
| ARG-127 | 122.8 (8.31)  | 176.3 | 55.6 (4.90)        | 28.3 (1.52)        | Cγ 27.9 (1.64)                                         |
| GLN-128 | 121.0 (7.53)  | 172.2 | 54.2 (4.54)        | 32.1 (2.02 , 1.87) | Cγ 33.7 (2.18) Nε2 110.5 (7.26 , 6.81)                 |
| PHE-129 | 125.5 (8.62)  | 174.5 | 56.0 (6.04)        | 42.1 (3.14 , 2.99) | Qδ 7.09 Qε 6.75                                        |
| ARG-130 | 125.3 (8.02)  | 172.1 | 53.4 (4.37)        | 32.3 (1.45)        | Cδ 42.0 (2.76) Cγ 27.0 (1.50)                          |
| ILE-131 | 121.9 (8.46)  | 175.5 | 58.3 (3.88)        | 35.7 (1.84)        | Cδ1 8.5 (0.38) Cγ1 27.0 (1.12) Cγ2 17.5 (0.79)         |
| GLY-132 | 115.7 (8.81)  | 171.6 | 44.2 (4.06)        |                    |                                                        |
| ASP-133 | 123.7 (7.91)  | 174.1 | 54.8 (4.58)        | 45.4 (2.35 , 2.11) |                                                        |

|         |               |       |                    |                    |                                                            |
|---------|---------------|-------|--------------------|--------------------|------------------------------------------------------------|
| ILE-134 | 119.1 (8.26)  | 174.8 | 61.6 (4.39)        | 37.5 (1.83)        | Cδ1 14.1 (0.78) Cγ1 26.6 (0.94) Cγ2 17.9 (0.73)            |
| ALA-135 | 129.3 (8.61)  | 173.4 | 50.6 (4.76)        | 23.3 (1.39)        |                                                            |
| GLY-136 | 101.2 (7.51)  | 172.6 | 44.3 (3.55 , 4.42) |                    |                                                            |
| GLU-137 | 121.0 (8.22)  | 174.9 | 53.1               | 28.3 (2.13 , 2.04) | Cγ 34.3 (2.21)                                             |
| HIS-138 | 124.2 (8.05)  | 175.4 | 57.9 (4.77)        | 27.7 (3.43)        | Hδ2 7.09 Hε1 8.15                                          |
| THR-139 | 125.3 (9.06)  | 174.2 | 63.2 (3.86)        | 68.1 (3.19)        | Cγ2 22.1 (1.04)                                            |
| SER-140 | 121.8 (8.83)  | 176.7 | 58.0 (4.56)        | 63.0 (4.00 , 3.64) |                                                            |
| PHE-141 | 128.8 (9.60)  | 175.4 | 61.3 (3.95)        | 39.4 (2.60 , 2.51) | Qδ 6.81 Qε 7.13                                            |
| ASP-142 | 113.1 (8.02)  | 175.4 | 55.2 (4.35)        | 41.0 (2.83 , 2.35) |                                                            |
| LYS-143 | 117.7 (7.34)  | 175.6 | 54.1 (4.44)        | 32.5 (2.07 , 1.46) | Cδ 30.2 (1.83 , 1.59) Cε 42.6 (2.83) Cγ 24.6 (1.28 , 1.17) |
| LEU-144 | 120.5 (6.70)  | 174.1 | 52.8 (3.90)        | 41.0 (1.12 , 1.25) | Cδ1 26.3 (0.62) Cδ2 22.1 (0.72) Cγ 25.7 (1.82)             |
| PRO-145 |               | 172.7 | 62.7 (4.04)        | 30.1 (1.90 , 0.93) | Cδ 49.6 (3.18 , 2.27) Cγ 26.8 (0.67 , 1.35)                |
| GLU-146 | 119.1 (8.34)  | 176.0 | 56.1 (3.97)        | 30.1 (1.94 , 1.74) | Cγ 35.9 (2.14 , 2.10)                                      |
| GLY-147 | 104.3 (7.24)  | 171.7 | 43.9 (3.92 , 3.81) |                    |                                                            |
| GLY-148 | 107.0 (8.24)  | 171.8 | 43.6 (3.71 , 4.35) |                    |                                                            |
| ARG-149 | 117.8 (8.21)  | 175.0 | 54.2 (5.38)        | 33.0 (1.55)        | Cδ 42.4 (2.99) Cγ 26.8 (1.41 , 1.30)                       |
| ALA-150 | 126.6 (9.03)  | 175.0 | 50.7 (4.73)        | 23.4 (1.22)        |                                                            |
| THR-151 | 117.9 (8.56)  | 171.9 | 62.0 (4.85)        | 69.7 (3.76)        | Cγ2 21.2 (1.03)                                            |
| TYR-152 | 126.1 (10.01) | 174.6 | 55.8 (4.58)        | 40.1 (2.72 , 2.40) | Qδ 6.90 Qε 6.54                                            |
| ARG-153 | 121.0 (8.86)  | 177.4 | 54.0 (5.40)        | 33.5 (1.90 , 1.73) | Cδ 42.6 (3.13) Cγ 27.9 (1.63)                              |
| GLY-154 | 114.2 (8.92)  | 173.8 | 46.8 (4.82 , 4.42) |                    |                                                            |
| THR-155 | 126.4 (9.06)  | 170.4 | 62.3 (4.71)        | 72.6 (3.18)        | Cγ2 21.1 (0.86)                                            |
| ALA-156 | 127.5 (7.09)  | 174.0 | 48.8 (5.29)        | 22.6 (0.82)        |                                                            |
| PHE-157 | 117.0 (8.54)  | 171.9 | 53.3 (5.44)        | 41.0 (3.23 , 2.48) | Qδ 6.86 Qε 6.69                                            |
| GLY-158 | 108.4 (8.55)  | 173.1 | 42.6 (3.12 , 4.0)  |                    |                                                            |
| SER-159 | 115.2 (7.61)  | 176.1 | 58.8 (3.42)        | 61.9 (3.57)        |                                                            |
| ASP-160 | 124.8 (9.89)  | 175.2 | 55.4 (4.17)        | 39.2 (2.86 , 2.70) |                                                            |
| ASP-161 | 116.7 (7.52)  | 172.7 | 54.3 (4.57)        | 40.6 (2.49 , 2.29) |                                                            |
| ALA-162 | 128.2 (8.54)  | 177.7 | 49.9 (4.92)        | 17.5 (1.25)        |                                                            |
| GLY-163 | 106.5 (8.41)  | 174.3 | 45.0 (4.29 , 3.89) |                    |                                                            |
| GLY-164 | 106.4 (7.13)  | 173.9 | 45.2 (4.12 , 3.64) |                    |                                                            |
| LYS-165 | 123.9 (9.65)  | 174.4 | 53.5 (5.05)        | 34.6 (1.69)        | Cδ 29.1 (1.56) Cγ 23.7 (1.45 , 1.29)                       |
| LEU-166 | 126.3 (7.71)  | 174.8 | 52.7 (4.87)        | 44.6 (1.06)        | Cδ1 25.3 (0.72) Cδ2 23.8 (0.60) Cγ 26.8 (0.33)             |
| THR-167 | 123.0 (8.37)  | 172.1 | 61.8 (4.95)        | 70.2 (3.78)        | Cγ2 20.3 (1.06)                                            |
| TYR-168 | 128.1 (9.17)  | 172.2 | 58.2 (4.77)        | 43.7 (2.41 , 2.21) | Qδ 6.57 Qε 7.26                                            |
| THR-169 | 124.5 (8.71)  | 172.5 | 60.8 (5.40)        | 70.8 (3.59)        | Cγ2 20.4 (0.89)                                            |
| ILE-170 | 123.7 (8.93)  | 173.1 | 60.6 (4.31)        | 41.3 (1.21)        | Cδ1 11.8 (0.55) Cγ1 27.1 (0.62) Cγ2 16.2 (-0.33)           |
| ASP-171 | 125.2 (8.37)  | 177.2 | 51.7 (4.75)        | 41.7 (2.80 , 2.31) |                                                            |
| PHE-172 | 123.6 (8.97)  | 176.9 | 61.5 (3.88)        | 37.4 (2.99 , 2.38) | Qδ 6.95 Qε 7.06 HZ 7.32                                    |
| ALA-173 | 122.1 (8.27)  | 178.9 | 54.5 (4.32)        | 17.6 (1.53)        |                                                            |
| ALA-174 | 118.8 (7.41)  | 176.6 | 51.2 (4.10)        | 18.3 (1.14)        |                                                            |

|         |               |       |                    |                     |                                                            |
|---------|---------------|-------|--------------------|---------------------|------------------------------------------------------------|
| LYS-175 | 114.4 (7.91)  | 174.6 | 57.0 (3.39)        | 30.1 (2.20 , 1.90)  | Cδ 29.5 (1.61) Cγ 25.8 (1.50)                              |
| GLN-176 | 116.4 (7.63)  | 174.3 | 54.4 (5.41)        | 34.8 (1.73 , 1.66)  | Cγ 34.2 (2.18) Nε2 111.9 (7.59 , 6.60)                     |
| GLY-177 | 110.2 (8.85)  | 170.8 | 44.6 (5.21 , 3.53) |                     |                                                            |
| ASN-178 | 112.7 (7.64)  | 171.5 | 53.7 (4.22)        | 41.5 (2.71 , 2.50)  | Nδ2 114.1 (7.30 , 6.54)                                    |
| GLY-179 | 106.7 (9.10)  | 172.4 | 47.2 (4.49 , 4.08) |                     |                                                            |
| LYS-180 | 121.8 (9.18)  | 172.5 | 56.6 (4.82)        | 35.4 (1.81 , 1.60)  | Cδ 28.5 (1.37) Cε 41.6 (2.71) Cγ 23.5 (1.16 , 0.89)        |
| ILE-181 | 123.4 (8.35)  | 174.0 | 60.5 (4.58)        | 39.6 (1.69)         | Cδ1 14.8 (0.56) Cγ2 17.9 (0.73)                            |
| GLU-182 | 122.3 (8.49)  | 175.4 | 53.4 (4.47)        | 35.5 (1.35)         | Cγ 37.1 (1.89 , 1.68)                                      |
| HIS-183 | 109.6 (8.43)  | 176.0 | 57.5 (3.98)        | 27.4 (3.42 , 3.34)  | Hδ2 6.71 He1 7.76                                          |
| LEU-184 | 124.4 (9.60)  | 178.8 | 56.0 (4.28)        | 39.9 (1.57 , 1.12)  | Cδ1 28.3 (0.48) Cδ2 22.4 (0.53) Cγ 31.3 (1.23)             |
| LYS-185 | 122.9 (10.00) | 177.7 | 57.7 (3.68)        | 31.9 (1.65 , 1.58)  | Cδ 29.0 (1.58 , 1.50) Cγ 24.8 (1.55 , 1.39) Cε 42.0 (2.90) |
| SER-186 | 115.2 (7.26)  | 173.1 | 54.6 (4.67)        | 62.7 (3.64 , 3.56)  |                                                            |
| PRO-187 |               |       | 65.4 (3.96)        | 32.1 (2.31 , 1.87)  | Cδ 50.7 (3.76 , 4.10) Cγ 27.2 (1.92 , 1.99)                |
| GLU-188 | 113.0 (8.08)  | 173.9 | 56.6 (3.01)        | 29.6 (1.66 , 1.38)  | Cγ 36.6 (1.98 , 1.75)                                      |
| LEU-189 | 112.9 (7.13)  | 175.6 | 53.8 (3.97)        | 41.2 (1.39)         | Cδ1 20.7 (0.33) Cδ2 24.7 (0.72) Cγ 26.3 (1.24)             |
| ASN-190 | 117.9 (6.95)  | 175.7 | 53.2 (4.60)        | 36.5 (2.74 , 2.67)  | Nδ2 112.4 (7.08)                                           |
| VAL-191 | 113.3 (7.18)  | 174.9 | 59.8 (4.48)        | 33.0 (2.16)         | Cγ1 21.9 (0.64) Cγ2 17.3 (0.44)                            |
| ASP-192 | 118.1 (8.83)  | 174.9 | 54.1 (4.78)        | 41.6 (2.41)         |                                                            |
| LEU-193 | 123.1 (8.38)  | 171.1 | 52.3 (4.15)        | 38.2 (0.95 , -0.06) | Cδ1 25.4 (0.20) Cδ2 22.6 (-0.03)                           |
| ALA-194 | 126.3 (8.22)  | 176.2 | 52.5 (4.10)        | 20.0 (1.40)         |                                                            |
| ALA-195 | 122.0 (8.28)  | 178.1 | 51.8 (4.86)        | 17.4 (1.10)         |                                                            |
| ALA-196 | 126.0 (8.82)  | 175.1 | 50.4 (4.63)        | 23.5 (1.21)         |                                                            |
| ASP-197 | 118.6 (8.37)  | 176.0 | 54.0 (5.16)        | 41.7 (2.65 , 2.34)  |                                                            |
| ILE-198 | 119.7 (7.92)  | 174.7 | 61.0 (4.32)        | 42.0 (1.49)         | Cδ1 14.9 (0.60) Cγ1 27.1 (1.12) Cγ2 19.2 (0.93)            |
| LYS-199 | 127.1 (9.18)  | 172.6 | 53.4 (4.53)        | 34.8 (1.54 , 1.36)  | Cε 41.8 (2.88) Cδ 27.7 (1.62) Cγ 24.5 (1.22)               |
| PRO-200 |               |       |                    |                     |                                                            |
| ASP-201 | 123.2 (8.39)  | 179.3 | 51.3 (4.55)        | 40.3 (2.5 , 3.12)   |                                                            |
| GLY-202 |               |       | 46.5 (3.43 , 3.71) |                     |                                                            |
| LYS-203 | 120.3 (7.74)  | 174.9 | 55.1 (4.12)        | 31.2 (0.58 , 1.16)  | Cδ 28.5 (1.42 , 1.32) Cγ 24.9 (1.08 , 1.02)                |
| ARG-204 | 111.8 (8.06)  | 175.2 | 56.9 (3.44)        | 26.6 (2.15 , 2.10)  | Cδ 41.7 (3.17) Cγ 26.7 (1.57)                              |
| HIS-205 | 120.3 (8.53)  | 174.9 | 53.7 (4.77)        | 27.8 (3.14 , 2.82)  | Hδ2 6.50 He1 7.60                                          |
| ALA-206 | 123.2 (8.49)  | 175.8 | 52.2 (4.62)        | 19.8 (1.21)         |                                                            |
| VAL-207 | 123.2 (9.17)  | 173.4 | 60.8 (4.98)        | 35.5 (2.05)         | Cγ1 21.2 (0.77) Cγ2 19.0 (0.71)                            |
| ILE-208 | 122.7 (8.89)  | 174.7 | 60.8 (4.31)        | 41.6 (1.35)         | Cδ1 13.5 (0.67) Cγ1 27.1 (1.22 , 0.71) Cγ2 18.1 (0.65)     |
| SER-209 | 122.1 (8.42)  | 173.0 | 55.7 (4.91)        | 64.4 (3.61 , 3.53)  |                                                            |
| GLY-210 | 110.5 (7.29)  | 172.5 | 45.2 (4.43 , 3.35) |                     |                                                            |
| SER-211 | 116.5 (8.65)  | 172.9 | 58.8 (5.03)        | 64.4 (3.84 , 3.64)  |                                                            |
| VAL-212 | 117.1 (7.40)  | 174.5 | 58.8 (5.04)        | 30.5 (1.62)         | Cγ1 24.4 (0.68) Cγ2 20.7 (0.61)                            |
| LEU-213 | 124.2 (8.96)  | 175.5 | 52.6 (5.31)        | 45.6 (1.59 , 1.03)  | Cδ1 25.3 (0.73) Cδ2 22.9 (0.58) Cγ 27.3 (1.29)             |
| TYR-214 | 120.2 (8.84)  | 176.0 | 56.9 (4.77)        | 41.7 (2.70 , 2.75)  | Qδ 6.89 Qε 6.70                                            |
| ASN-215 | 129.8 (9.29)  | 174.3 | 53.9 (4.00)        | 36.5 (2.21 , 2.75)  | Nδ2 111.6 (7.01 , 6.48)                                    |
| GLN-216 | 106.4 (8.61)  | 173.5 | 57.9 (3.45)        | 26.1 (2.29 , 2.19)  | Cγ 34.0 (2.14) Nε2 112.5 (6.68 , 7.39)                     |

|         |              |       |                     |                    |                                                                                   |
|---------|--------------|-------|---------------------|--------------------|-----------------------------------------------------------------------------------|
| ALA-217 | 123.3 (7.66) | 176.4 | 50.8 (4.61)         | 20.5 (1.37)        |                                                                                   |
| GLU-218 | 122.6 (8.71) | 177.9 | 57.5 (4.53)         | 28.8 (1.98 , 2.09) | C $\gamma$ 36.2 (2.39 , 2.26)                                                     |
| LYS-219 | 126.9 (8.84) | 173.8 | 53.1 (4.61)         | 34.2 (2.25 , 1.28) | C $\delta$ 28.1 (1.58) C $\epsilon$ 41.9 (2.79) C $\gamma$ 24.5 (1.65 , 1.46)     |
| GLY-220 | 107.0 (7.93) | 173.9 | 44.5 ( 5.47 , 3.72) |                    |                                                                                   |
| SER-221 | 117.3 (8.68) | 171.0 | 56.8 (5.46)         | 66.7 (3.84 , 3.79) |                                                                                   |
| TYR-222 | 117.6 (8.96) | 172.8 | 55.8 (5.39)         | 41.7 (2.63 , 2.43) | Q $\delta$ 6.30 Q $\epsilon$ 6.20 HH 7.61                                         |
| SER-223 | 115.6 (8.84) | 173.1 | 56.6 (5.17)         | 64.5 (3.65 , 3.60) |                                                                                   |
| LEU-224 | 123.5 (9.30) | 175.6 | 53.1 (4.75)         | 46.3 (1.18 , 0.93) | C $\delta$ 1 23.7 (-0.38) C $\delta$ 2 23.0 (-0.19) C $\gamma$ 25.4 (1.17)        |
| GLY-225 | 109.0 (9.04) | 171.5 | 43.8 (4.62 , 3.41)  |                    |                                                                                   |
| ILE-226 | 120.2 (6.85) | 174.8 | 60.4 (4.62)         | 38.2 (1.37)        | C $\delta$ 1 14.5 (0.71) C $\gamma$ 2 16.0 (1.00) C $\gamma$ 1 27.8 (1.21)        |
| PHE-227 | 128.2 (9.39) | 175.1 | 58.1 (4.77)         | 42.5 (2.22 , 2.81) | Q $\delta$ 6.57 Q $\epsilon$ 6.72                                                 |
| GLY-228 | 104.6 (8.68) |       | 42.4 (3.17 , 4.31)  |                    |                                                                                   |
| GLY-229 |              |       | 46.9                |                    |                                                                                   |
| LYS-230 | 118.7 (8.37) | 174.7 | 54.1 (4.30)         | 30.8 (1.82 , 1.04) | C $\delta$ 28.6 (1.50)                                                            |
| ALA-231 | 118.1 (7.63) | 176.7 | 51.9 (3.81)         | 16.1 (1.16)        |                                                                                   |
| GLN-232 | 118.0 (9.39) | 176.0 | 61.0 (3.88)         | 28.7 (1.84)        | C $\gamma$ 31.7 (2.24)                                                            |
| GLU-233 | 116.6 (8.82) | 174.9 | 54.3 (5.41)         | 33.8 (1.72)        | C $\gamma$ 34.1 (2.17)                                                            |
| VAL-234 | 109.3 (8.34) | 174.8 | 57.9 (5.54)         | 35.4 (1.47)        | C $\gamma$ 1 20.0 (-0.04) C $\gamma$ 2 17.4 (0.04)                                |
| ALA-235 | 120.7 (8.47) | 176.4 | 51.3 (4.94)         | 20.3 (1.05)        |                                                                                   |
| GLY-236 | 111.1 (9.36) | 170.1 | 46.2 (5.08 , 4.02)  |                    |                                                                                   |
| SER-237 | 115.3 (8.89) | 171.4 | 56.5 (5.28)         | 66.4 (3.84 , 3.71) |                                                                                   |
| ALA-238 | 119.9 (9.08) | 174.5 | 49.9 (5.15)         | 21.7 (1.02)        |                                                                                   |
| GLU-239 | 122.7 (9.02) | 174.1 | 54.8 (4.63)         | 31.4 (1.78)        | C $\gamma$ 36.1 (2.04 , 1.87)                                                     |
| VAL-240 | 124.2 (8.81) | 174.8 | 61.4 (4.39)         | 33.9 (1.61)        | C $\gamma$ 2 21.4 (0.65)                                                          |
| LYS-241 | 127.6 (8.84) | 174.5 | 56.0 (3.98)         | 32.1 (1.45 , 1.64) | C $\epsilon$ 41.5 (2.81) C $\gamma$ 25.1 (1.20) C $\delta$ 28.8 (1.55)            |
| THR-242 | 114.5 (7.21) | 176.5 | 61.1 (4.36)         | 72.6 (4.28)        | C $\gamma$ 2 21.3 (0.79)                                                          |
| VAL-243 | 120.7 (9.58) | 176.2 | 64.7 (3.85)         | 31.0 (2.10)        | C $\gamma$ 1 20.1 (0.87)                                                          |
| ASN-244 | 115.6 (7.57) | 173.8 | 52.0 (4.88)         | 39.2 (2.25 , 2.89) | N $\delta$ 2 113.6 (6.86 , 7.58)                                                  |
| GLY-245 | 107.7 (7.36) | 174.3 | 43.3 (4.54 , 3.73)  |                    |                                                                                   |
| ILE-246 | 122.7 (8.67) | 176.9 | 61.1 (4.35)         | 36.9 (1.63)        | C $\delta$ 1 12.2 (0.72) C $\gamma$ 1 27.7 (1.48 , 1.03) C $\gamma$ 2 17.3 (0.50) |
| ARG-247 | 128.5 (9.23) | 173.9 | 53.5 (4.37)         | 31.9 (1.47)        | C $\delta$ 41.8 (3.02) C $\gamma$ 27.2 (1.79)                                     |
| HIS-248 | 121.1 (8.52) | 174.6 | 55.8 (5.32)         | 32.9 (2.94)        | H $\delta$ 2 7.15 H $\epsilon$ 1 7.70                                             |
| ILE-249 | 119.4 (8.72) | 176.2 | 58.5 (4.52)         | 42.0 (1.39)        | C $\delta$ 1 13.9 (0.57) C $\gamma$ 1 25.4 (1.22 , 0.73) C $\gamma$ 2 17.8 (0.54) |
| GLY-250 | 113.7 (9.35) | 171.0 | 44.2 (3.71 , 2.12)  |                    |                                                                                   |
| LEU-251 | 120.8 (7.83) | 174.5 | 52.5 (4.72)         | 46.8 (0.78 , 1.03) | C $\delta$ 1 23.8 (0.59) C $\delta$ 2 25.7 (0.38) C $\gamma$ 26.3 (0.48)          |
| ALA-252 | 122.9 (7.91) | 173.4 | 51.5 (4.59)         | 21.5 (0.92)        |                                                                                   |
| ALA-253 | 123.0 (9.04) | 174.9 | 51.7 (4.73)         | 23.0 (0.93)        |                                                                                   |
| LYS-254 | 115.7 (8.17) | 175.1 | 53.9 (5.73)         | 36.3 (1.78 , 2.06) | C $\epsilon$ 40.4 (2.99) C $\gamma$ 22.6 (1.62)                                   |
| GLN-255 | 122.7 (8.86) | 176.6 | 57.1 (4.28)         | 29.5 (1.93 , 1.77) | C $\gamma$ 33.0 (2.04)                                                            |
| HIS-256 | 124.2 (8.62) | 173.7 | 54.9 (4.58)         |                    |                                                                                   |

**Table S3.** Statistical analysis of the energy minimized family of conformers of fHbp.

|                                                                      | <b>fHbp<sup>a</sup></b><br><b>(30 Conformers)</b> |
|----------------------------------------------------------------------|---------------------------------------------------|
| Total number of meaningful NOE upper distance constraints            | 2987                                              |
| <b>Intra-protein NOEs<sup>b</sup></b>                                |                                                   |
| Intra-residue                                                        | 481                                               |
| Inter-residue                                                        |                                                   |
| Sequential ( $ i-j  = 1$ )                                           | 919                                               |
| Medium-range ( $ i-j  < 4$ )                                         | 399                                               |
| Long-range ( $ i-j  > 5$ )                                           | 1188                                              |
| Total meaningful dihedral angle restraints <sup>b</sup>              | 316                                               |
| Phi                                                                  | 158                                               |
| Psi                                                                  | 158                                               |
| <b>RMS violations per meaningful distance constraint (Å):</b>        |                                                   |
| Intraresidue                                                         | 0.0205±0.0014                                     |
| Sequential                                                           | 0.0077±0.0009                                     |
| Medium range                                                         | 0.0101±0.00014                                    |
| Long range                                                           | 0.0085±0.0009                                     |
| <b>RMS violations per meaningful dihedral angle constraints (°):</b> |                                                   |
| Phi                                                                  | 2.3646±1.2693                                     |
| Psi                                                                  | 2.2273±1.3964                                     |
| <b>Average number of violations per conformer:</b>                   |                                                   |
| Intraresidue                                                         | 20.069 ±3.005                                     |
| Sequential                                                           | 14.586±2.871                                      |
| Medium range                                                         | 11.000±2.613                                      |
| Long range                                                           | 23.900±4.294                                      |
| Phi                                                                  | 2.6000±1.1358                                     |
| Psi                                                                  | 3.8500±1.3219                                     |
| NOE violations larger than 0.3 Å                                     | 0.000                                             |
| <b>Average RMSD to the mean (Å)</b>                                  |                                                   |
| Residue range 14-255 (backbone atoms)                                | 1.25±0.23                                         |
| Residue range 14-255 (all heavy atoms)                               | 1.75±0.21                                         |
| Secondary structure elements (backbone atoms)                        | 1.01±0.21                                         |
| Secondary structure elements (all heavy atoms)                       | 1.50 ±0.21                                        |
| residual CYANA Target Function (Å <sup>2</sup> )                     | 2.13±0.44                                         |
| <b>Structural analysis<sup>c</sup></b>                               |                                                   |
| % of residues in most favorable regions                              | 72.5                                              |
| % of residues in allowed regions                                     | 23.1                                              |
| % of residues in generously allowed regions                          | 3.4                                               |
| % of residues in disallowed regions                                  | 1.0                                               |
| <b>WHAT IF structure Z-scores<sup>d</sup></b>                        |                                                   |
| 1st generation packing quality                                       | -2.92                                             |
| 2st generation packing quality                                       | -2.17                                             |
| Ramachandran plot appearance                                         | -3.62                                             |
| $\chi_1/\chi_2$ rotamer normality                                    | -3.72                                             |
| Backbone conformation                                                | 0.71                                              |
| <b>WHAT IF RMS Z-scores<sup>e</sup></b>                              |                                                   |



|                                                |                     |
|------------------------------------------------|---------------------|
| Bond lengths                                   | 0.63                |
| Bond angles                                    | 1.17                |
| Omega angle restraints                         | 1.4                 |
| Side chain planarity                           | 1.82                |
| Improper dihedral distribution                 | 1.01                |
| Inside/Outside distribution                    | 1.03                |
| <b>QUEEN</b>                                   |                     |
| $I_{\text{uni}}/I_{\text{total}} (\%) < 0.001$ | 2507 (76%)          |
| Average/SD                                     | $0.0016 \pm 0.0054$ |
| Max                                            | 0.091               |

<sup>a</sup> Structure calculations were performed with the program CYANA 2.1 [Güntert, P. *et al* J.Mol.Biol. 273, 1997]. A total of 900 random conformers were subjected to 13000 steps of a simulated annealing process. Each member of the family was submitted to restrained energy minimization (REM in explicit solvent) with the Amber-10 package [Case D.A. *et al* University of California: San Francisco, CA, 2008]. Values of 50 kcal mol<sup>-1</sup> Å<sup>-2</sup> and 32 kcal mol<sup>-1</sup> rad<sup>-2</sup> were used as force constants for the NOE and torsion angle restraints, respectively. The data are calculated over the 30 conformers representing the NMR structure and on the energy minimized mean structure. The mean value and the standard deviation are given

<sup>b</sup> Number of meaningful constraints for each class. Backbone dihedral angle constraints were derived from <sup>15</sup>N, <sup>13</sup>C', <sup>13</sup>Cα, <sup>13</sup>Cβ, and Ha chemical shifts, using TALOS and added as restraints in the structure calculations as well.

<sup>c</sup> As it results from the Ramachandran plot analysis performed with PROCHECK.

<sup>d</sup> Values calculated on secondary structure elements. A Z-score is defined as the deviation from the average value for this indicator observed in a database of high-resolution crystal structures, expressed in units of the standard deviation of this database-derived average. Typically, Z-scores below a value of -3 are considered poor, those below -4 are considered bad.

<sup>e</sup> Values calculated on all residues.

## Reference List

1. Cantini, F., Savino, S., Scarselli, M., Masignani, V., Pizza, M. G., Romagnoli, G., Swennen, E., Veggi, D., Banci, L., and Rappuoli, R. (2006) *J.Biol.Chem.* **281**, 7220-7227
2. Cornilescu, G., Delaglio, F., and Bax, A. (1999) *J Biomol NMR* **13**, 289-302
3. Nabuurs, S. B., Spronk, C. A., Krieger, E., Maassen, H., Vriend, G., and Vuister, G. W. (2003) *J.Am.Chem.Soc.* **125**, 12026-12034
4. Vriend, G. (1990) *J.Mol.Graphics* **8**, 52-56
5. Laskowski, R. A., Rullmann, J. A. C., MacArthur, M. W., Kaptein, R., and Thornton, J. M. (1996) *J.Biomol.NMR* **8**, 477-486
6. Koradi, R., Billeter, M., and Wüthrich, K. (1996) *J.Mol.Graphics* **14**, 51-55
7. Grzesiek, S. and Bax, A. (1993) *J.Am.Chem.Soc.* **115**, 12593-12594
8. Peng, J. W. and Wagner, G. (1992) *J.Magn.Reson.* **98**, 308-332
9. Gitschier, J., Moffat, B., Reilly, D., Wood, W. I., and Fairbrother, W. J. (1998) *Nature Struct.Biol.* **5**, 47-54
10. Banci, L., Bertini, I., Chasapis, C., Ciofi-Baffoni, S., Hadjiliadis, N., and Rosato, A. (2005) *FEBS J.* **272**, 865-871
11. Hwang, T.-J. and Shaka, A. J. (1995) *J Magn Reson A* **112**, 275-279
12. Sklenar, V., Piotto, M., Leppik, R., and Saudek, V. (1993) *J.Magn.Reson.Ser.A* **102**, 241-245
13. Schleucher, J., Schwendinger, M., Sattler, M., Schmidt, P., Schedletzky, O., Glaser, S. J., Sørensen, O. W., and Griesinger, C. (1994) *J.Biomol.NMR* **4**, 301-306
14. Eletsky, A., Kienhofer, A., and Pervushin, K. (2001) *J.Biomol.NMR* **20**, 177-180
15. Salzmann, M., Pervushin, K., Wider, G., Senn, H., and Wüthrich, K. (1998) *Proc.Natl.Acad.Sci.USA* **95**, 13585-13590
16. Salzmann, M., Wider, G., Pervushin, K., Senn, H., and Wüthrich, K. (1999) *J.Am.Chem.Soc.* **121**, 844-848
17. Yamazaki, T., Arrowsmith, C. H., Muhandiram, D. R., and Kay, L. E. (1994) *J.Am.Chem.Soc.* **116**, 11655-11666
18. Case D.A. *et al* University of California: San Francisco, CA,. (2008)

19. Kay, L. E., Xu, G. Y., Singer, A. U., Muhandiram, D. R., and Forman-Kay, J. D. (1993) *J.Magn.Reson.Ser.B* **101**, 333-337
20. Zhang, O., Kay, L. E., Olivier, J. P., and Forman-Kay, J. D. (1994) *J.Biomol.NMR* **4**, 845-858
21. Farrow, N. A., Muhandiram, R., Singer, A. U., Pascal, S. M., Kay, C. M., Gish, G., Shoelson, S. E., Pawson, T., Forman-Kay, J. D., and Kay, L. E. (1994) *Biochemistry* **33**, 5984-6003
22. Keller, R. and Wüthrich, K. A New Software for the Analysis of Protein NMR Spectra. 2002. Personal Communication
23. Keller, R. (2004) *The Computer Aided Resonance Assignment Tutorial*, CANTINA Verlag, Goldau
24. Bartels, C., Xia, T. H., Billeter, M., Güntert, P., and Wüthrich, K. (1995) *J.Biomol.NMR* **5**, 1-10
25. A.L. Davis, J. Keeler, E.D. Laue & D. Moskau, *J. Magn. Reson.* 98, 207-216 (1992)
